# Supplementary material for: Enhancing anatomy education with virtual reality: integrating three-dimensional models for improved learning efficiency and student satisfaction
Source: Frontiers journal article supplement (doi:10.3389/fmed.2025.1555053), 2025-06-04
Supplement: Presentation_1.pdf [file Presentation_1.pdf]

### **Axial Skeleton (Pre-class test)**

**1. Composition of the trunk bones ( )**

- A. Vertebrae, ribs, sternum
- B. Vertebrae, ribs
- C. Vertebrae, sacrum
- D. Thoracic vertebrae, ribs
- E. Thoracic vertebrae, sternum, sacrum

**Correct Answer: A**

**2. Vertebral foramen ( )**

- A. Formed by adjacent superior and inferior vertebral notches
- B. Formed by the vertebral body and lamina
- C. Formed by the vertebral body and vertebral arch
- D. Formed by the lamina and pedicle of the vertebral arch
- E. Formed by the vertebral body and processes

**Correct Answer: C**

**3. Intervertebral foramen ( )**

- A. Formed by the superior and inferior vertebral notches of adjacent vertebrae
- B. Formed by the vertebral body and lamina
- C. Formed by the vertebral body and vertebral arch
- D. Formed by the vertebral body and pedicle
- E. Formed by vertebral articulations

**Correct Answer: A**

**4. The atlas corresponds to:**

- A. The 1st cervical vertebra
- B. The 2nd cervical vertebra
- C. The 7th cervical vertebra
- D. The 4th thoracic vertebra
- E. The 5th lumbar vertebra

**Correct Answer: A**

**5. Vertebrae with transverse foramina are ( )**

- A. Cervical vertebrae
- B. Thoracic vertebrae
- C. Lumbar vertebrae
- D. Coccygeal vertebrae
- E. Sacrum

**Correct Answer: A**

**6. Morphological features of lumbar vertebrae include:**

- A. Heart-shaped vertebral body cross-section
- B. Bifid spinous processes
- C. Broad, plate-like spinous processes
- D. Overlapping spinous processes angled posteroinferiorly
- E. Transverse foramina

**Correct Answer: C**

**7. The sternal angle aligns with ( )**

- A. The 1st rib
- B. The 2nd rib
- C. The 3rd rib
- D. The 4th rib
- E. The 5th rib

**Correct Answer: B**

8. **A structural feature of ribs is:**

- A. Costal facets
- B. Transverse costal facets
- C. Costal notches
- D. Costal grooves
- E. Xiphocostal angles

**Correct Answer: D**

9. **Incorrect description of mandibular morphology:**

- A. Composed of a mandibular body and ramus
- B. The mandibular angle is palpable externally
- C. The external surface of the mandibular ramus contains the mandibular foramen
- D. The mental foramen is located on the anterolateral surface of the mandibular body
- E. The condylar process expands superiorly into the mandibular head

**Correct Answer: C**

10. **Correct description of sacral morphology:**

- A. Five pairs of anterior sacral foramina
- B. Formed by fusion of four sacral vertebrae
- C. Articulates with the 4th lumbar vertebra
- D. Contains the spinal cord within the sacral canal
- E. The sacral cornu serves as a landmark for sacral anesthesia

**Correct Answer: E**

**Axial Skeleton (In-class test)**

1. **Incorrect description of trunk bone composition ( )**

- A. Ribs
- B. Vertebrae
- C. Patella
- D. Coccyx
- E. Sternum

**Correct Answer: C**

2. **A typical vertebra lacks ( )**

- A. Vertebral body
- B. Vertebral arch
- C. Vertebral foramen
- D. Lateral masses
- E. Spinous process

**Correct Answer: D**

3. **The first cervical vertebra ( )**

- A. Also called the axis
- B. Also called the vertebra prominens
- C. Possesses a dens (odontoid process)
- D. Has a long spinous process
- E. Also called the atlas

**Correct Answer: E**

4. **Incorrect description of the vertebral arch:**

- A. Located posterior to the vertebral body
- B. Semilunar in shape
- C. Forms the vertebral foramen with the vertebral body
- D. Gives rise to a pair of spinous processes

E. The pedicle is the constricted portion connecting to the vertebral body

**Correct Answer: D**

**5. Morphological features of thoracic vertebrae include:**

- A. Transverse foramina on transverse processes
- B. Bifid spinous processes
- C. Poorly developed superior/inferior articular processes
- D. Horizontally oriented spinous processes
- E. Costal facets on the posterolateral vertebral bodies

**Correct Answer: E**

**6. Incorrect description of the sternum:**

- A. A flat bone
- B. Contributes to the thoracic cage
- C. Composed of a manubrium and body
- D. The sternal angle aligns with the 2nd costal cartilage
- E. Convex anteriorly

**Correct Answer: C**

**7. A unique feature of cervical vertebrae is ( )**

- A. Vertebral body
- B. Vertebral arch
- C. Transverse foramina
- D. Transverse processes
- E. Articular processes

**Correct Answer: C**

**8. An unpaired cranial bone is ( )**

- A. Parietal bone
- B. Occipital bone
- C. Lacrimal bone
- D. Inferior nasal concha
- E. Palatine bone

**Correct Answer: B**

**9. A 40-year-old female undergoes sacral anesthesia for perianal surgery. The landmark for needle placement is ( )**

- A. Sacral promontory
- B. Sacral tuberosity
- C. Sacral cornu
- D. Coccygeal apex
- E. Posterior sacral foramina

**Correct Answer: C**

**10. A structure belonging to the facial bones is ( )**

- A. Superior nasal concha
- B. Inferior nasal concha
- C. Frontal bone
- D. Sphenoid bone
- E. Ethmoid bone

**Correct Answer: B**
